# Supplementary material
Source: PubMed Central journal article supplement (PMC6530653)
Supplement: dey259suppl_table3.pdf [file dey259suppl_table3.pdf]

**Supplementary Table SIII Sensitivity analyses for semen parameters<sup>a</sup> among men at a fertility center who reported most frequently wearing boxers compared to men who did not.**

| Type of underwear                                     | Ejaculate volume (mL) | Sperm concentration (mil/mL) | Total sperm count (mil/ejaculate) | Total motility (%) | Total motile count (mil/ejaculate) | Normal morphology <sup>b</sup> (%) | Normal morphology count <sup>b</sup> (mil/ejaculate) |
|-------------------------------------------------------|-----------------------|------------------------------|-----------------------------------|--------------------|------------------------------------|------------------------------------|------------------------------------------------------|
| Adjusted <sup>b</sup>                                 |                       |                              |                                   |                    |                                    |                                    |                                                      |
| Primarily wearing boxers                              | 2.94 (2.79, 3.11)     | 60.5 (54.7, 67.0)            | 153 (138, 170)                    | 48.7 (46.3, 51.0)  | 62.7 (53.7, 73.3)                  | 6.61 (6.21, 7.11)                  | 8.2 (7.0, 9.6)                                       |
| Not primarily wearing boxers                          | 3.05 (2.79, 3.21)     | 48.5 (43.2, 54.5)            | 131 (116, 148)                    | 46.1 (43.6, 48.6)  | 47.3(38.9, 57.5)                   | 6.70 (6.21, 7.02)                  | 7.4 (6.2, 8.7)                                       |
| P-value                                               | 0.42                  | 0.004                        | 0.05                              | 0.13               | 0.02                               | 0.75                               | 0.38                                                 |
| Adjusted <sup>b</sup> + history of varicocele         |                       |                              |                                   |                    |                                    |                                    |                                                      |
| Primarily wearing boxers                              | 2.85 (2.69, 3.01)     | 59.3 (53.4, 65.9)            | 146 (131, 162)                    | 49.0 (46.5, 51.5)  | 60.1 (51.0, 70.8)                  | 6.53 (6.12, 6.94)                  | 7.7 (6.5, 9.0)                                       |
| Not primarily wearing boxers                          | 3.02 (2.85, 3.17)     | 47.5 (41.9, 53.8)            | 128 (112, 145)                    | 45.6 (43.0, 48.3)  | 45.1 (36.5, 55.8)                  | 6.49 (6.08, 6.89)                  | 7.0 (5.9, 8.5)                                       |
| P-value                                               | 0.16                  | 0.006                        | 0.11                              | 0.06               | 0.03                               | 0.88                               | 0.50                                                 |
| Adjusted <sup>b</sup> + hot bath/jacuzzi              |                       |                              |                                   |                    |                                    |                                    |                                                      |
| Primarily wearing boxers                              | 2.95 (2.79, 3.11)     | 60.4 (54.6, 66.9)            | 152 (138, 169)                    | 48.6 (46.3, 51.1)  | 62.3 (53.2, 72.9)                  | 6.61 (6.21, 7.02)                  | 8.2 (6.9, 9.6)                                       |
| Not primarily wearing boxers                          | 3.06 (2.90, 3.22)     | 48.7 (43.3, 54.6)            | 131 (117, 148)                    | 46.2 (43.7, 48.6)  | 47.8 (39.4, 58.0)                  | 6.70 (6.29, 7.11)                  | 7.4 (6.2, 8.8)                                       |
| P-value                                               | 0.33                  | 0.005                        | 0.06                              | 0.14               | 0.02                               | 0.76                               | 0.39                                                 |
| Adjusted <sup>b</sup> , restricted first semen sample |                       |                              |                                   |                    |                                    |                                    |                                                      |
| Primarily wearing boxers                              | 3.00 (2.85, 3.17)     | 58.3 (52.0, 65.3)            | 150 (134, 169)                    | 47.4 (45.0, 49.8)  | 59.4 (49.7, 71.0)                  | 6.67 (6.24, 7.11)                  | 8.2 (6.9, 9.8)                                       |
| Not primarily wearing boxers                          | 3.03 (2.86, 3.20)     | 44.4 (39.4, 50.0)            | 118 (104, 133)                    | 44.7 (42.1, 47.2)  | 41.4 (34.3, 49.9)                  | 6.65 (6.18, 7.11)                  | 6.3 (5.3, 7.6)                                       |
| P-value                                               | 0.85                  | 0.001                        | 0.005                             | 0.12               | 0.01                               | 0.94                               | 0.04                                                 |

Mil, million.

<sup>a</sup>Data are presented as predicted marginal means (95% CI).

<sup>b</sup>Models are adjusted for age (continuous), BMI (continuous), smoking status (ever and never smoked), abstinence time (continuous) and year of semen sample collection (continuous).
